# Supplementary material for: Pax6 modulates intra-retinal axon guidance and fasciculation of retinal ganglion cells during retinogenesis
Source: PubMed Central journal article supplement (PMC7527980; doi:10.1038/s41598-020-72828-4), 2020-09-30
Supplement: 41598_2020_72828_MOESM2_ESM.pdf [file 41598_2020_72828_MOESM2_ESM.pdf]

**Pax6 regulates intra-retinal axon guidance and fasciculation of retinal ganglion cells during retinogenesis**

*Soundararajan Lalitha<sup>1,2</sup>, Budhaditya Basu<sup>1</sup>, Suresh Surya<sup>1</sup>, Vadakkath Meera<sup>1,2</sup>, Paul Ann Riya<sup>1,2</sup>, Surendran Parvathy<sup>1,2</sup>, Ani Venmanad Das<sup>3</sup>, Krishnankutty Chandrika Sivakumar<sup>4</sup>, Shijulal Nelson-Sathi<sup>5</sup> and Jackson James<sup>1,2\*</sup>*

<sup>1</sup> Neuro Stem Cell Biology Laboratory, Neurobiology Division, Rajiv Gandhi Centre for Biotechnology, Thiruvananthapuram, Kerala-695 014, India

<sup>2</sup> Research Centre, The University of Kerala, Thiruvananthapuram, Kerala-695 014, India

<sup>3</sup> Cancer Biology Programs-12, Rajiv Gandhi Centre for Biotechnology, Thiruvananthapuram, Kerala-695 014, India

<sup>4</sup> Bioinformatics Facility, Rajiv Gandhi Centre for Biotechnology, Thiruvananthapuram, Kerala-695 014, India

<sup>5</sup> Interdisciplinary Biology, Rajiv Gandhi Centre for Biotechnology, Thiruvananthapuram, Kerala-695 014, India

Figure-S1

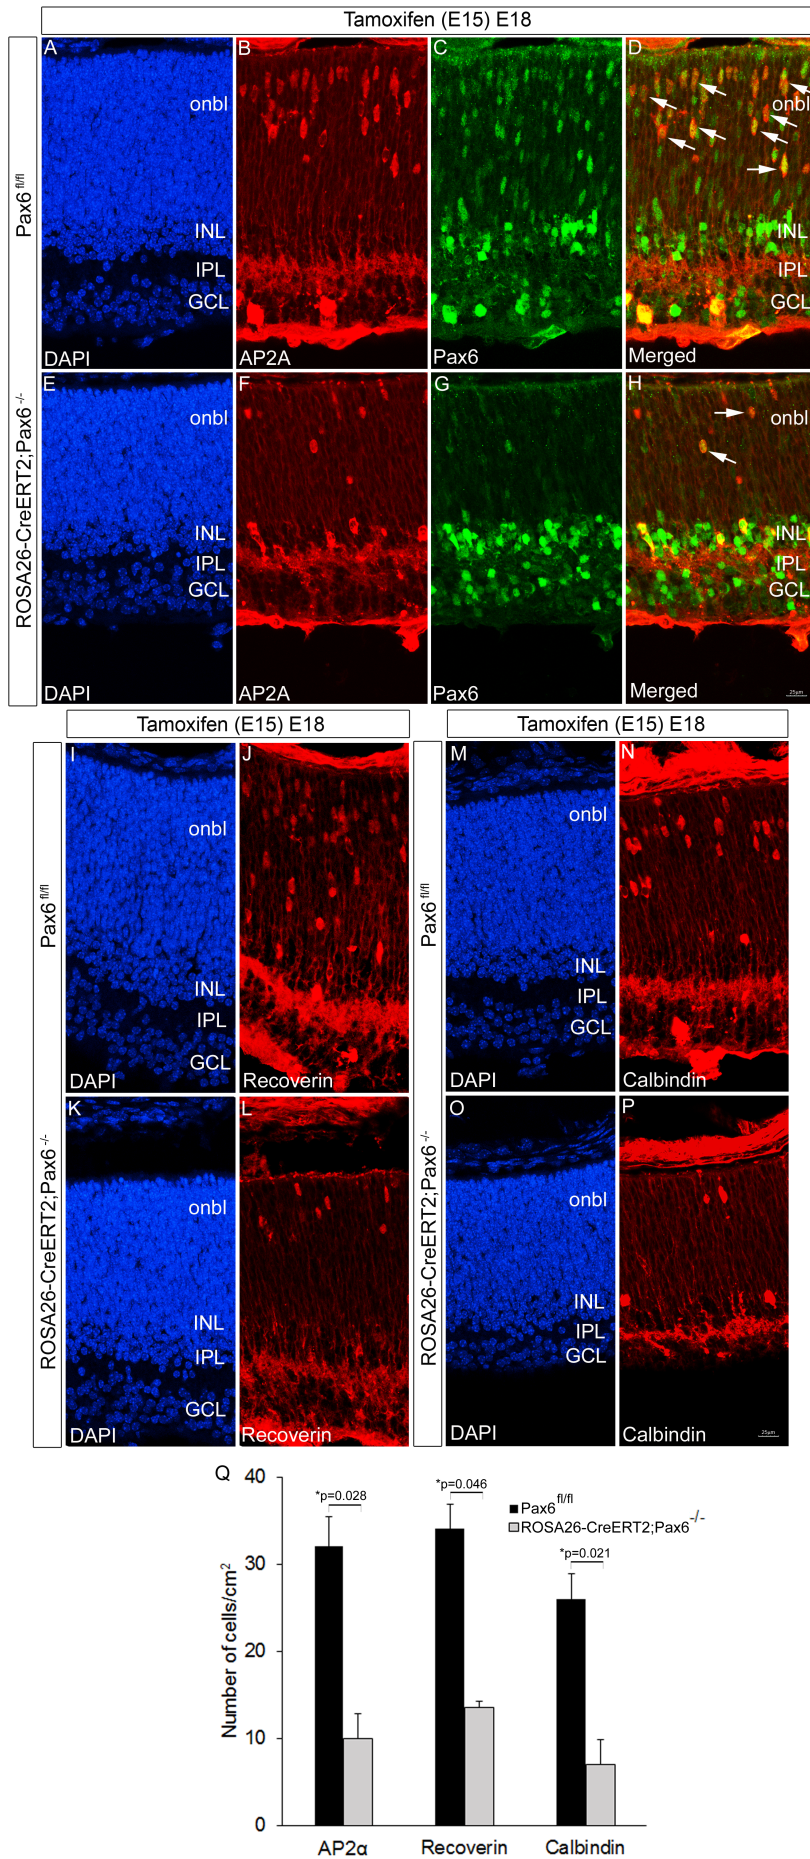

Figure-S2

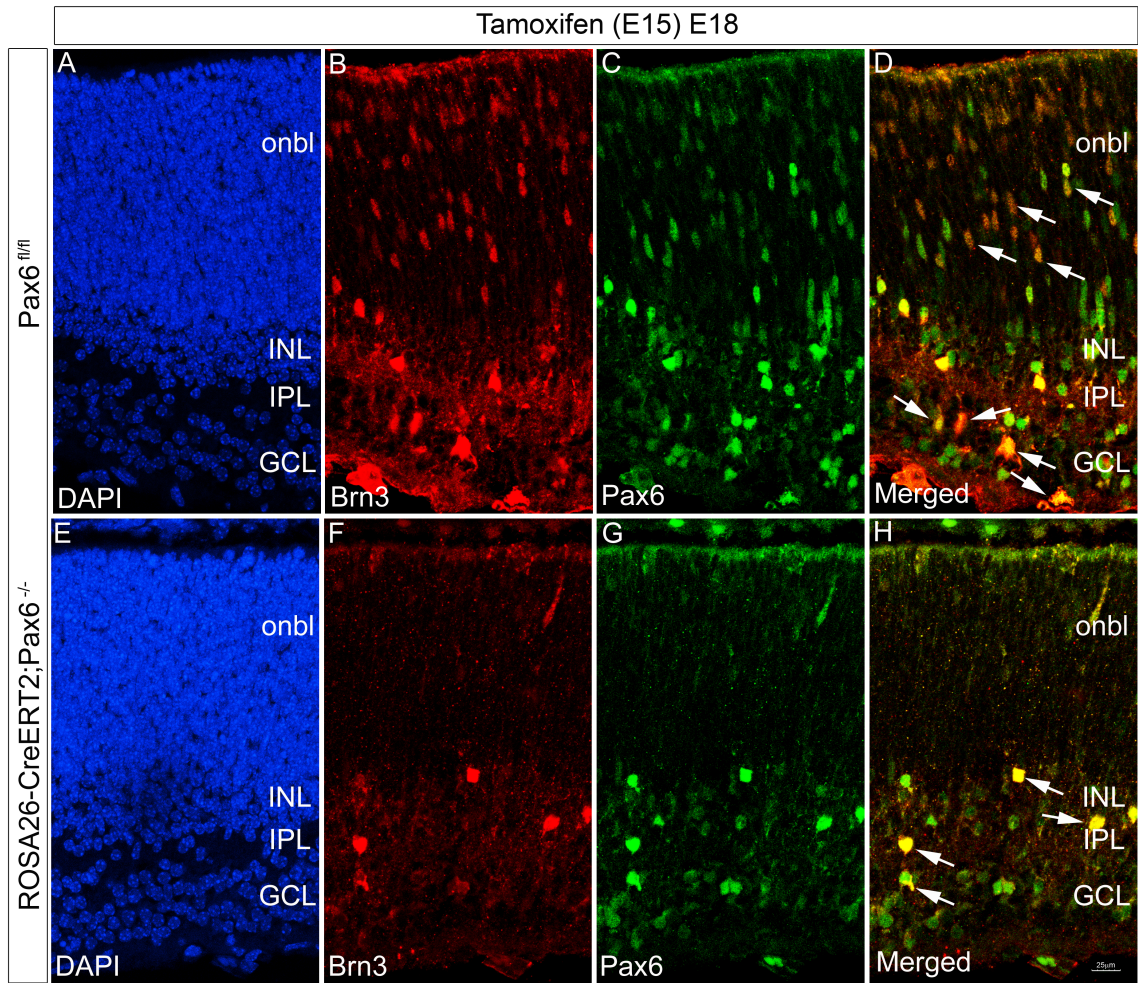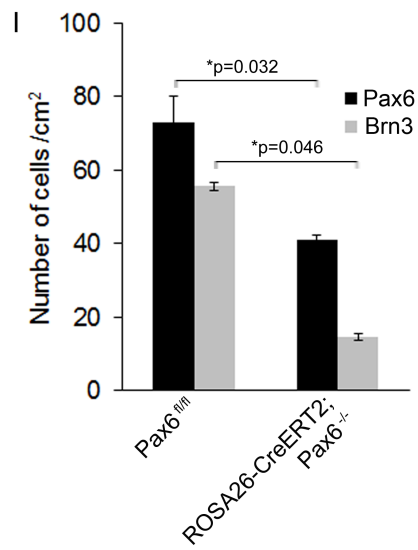

Figure-S3

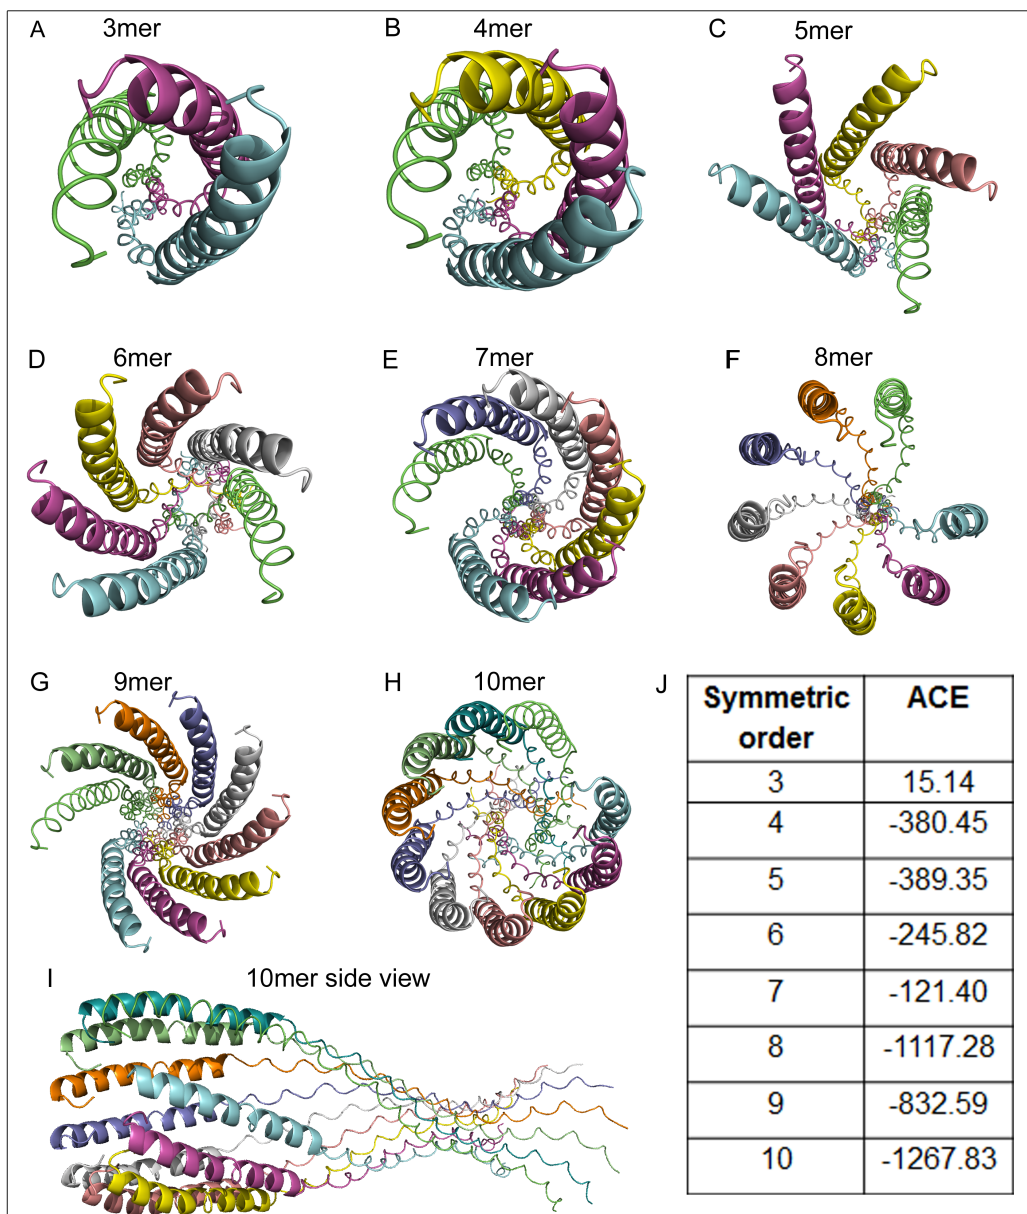

**Table S4****List of primers used in the study:**

| <b>Primer</b>     | <b>Sequence</b>                   | <b>Product size</b> |
|-------------------|-----------------------------------|---------------------|
| Pax6 siRNA1 F     | AAAAGCAGACGGCATGTATGATAAACTAAGGAT |                     |
| Pax6 siRNA1 R     | AAAGATCCTTAGTTTATCATACATGCCGTCTGC |                     |
| Pax6 siRNA2 F     | AAAACTCCTAGTCACATTCTATCAGCAGCAG   |                     |
| Pax6 siRNA2 R     | AAAGCTGCTGCTGATAGGAATGTGACTAGGAGT |                     |
| Pax6 siRNA3 F     | AAAAGCCCAGCTTCACCATGGCAAACAACCTGC |                     |
| Pax6 siRNA3 R     | AAAGGCAGGTTGTTTGCCATGGTGAAGCTGGGC |                     |
| Pax6 siRNA4 F     | AAAAGGAGTGAACCTGACATGTCTCAGTACTGG |                     |
| Pax6 siRNA4 R     | AAAGCCAGTACTGAGACATGTCAGGTTCACTCC |                     |
| Sema5b Promoter F | AAAGAATCTGGGGAGGGAAGGTGTG         | 2.5kb               |
| Sema5b Promoter R | AGAGGCTGGACACTAAGAAAGGGG          |                     |
| pPax6 ChIP F      | AGAGCCGAAAACAAGTGTATTC            | 269bp               |
| pPax6 ChIP R      | ATTAGCGAAGCCTGACCTC               |                     |
| pSema5B ChIP F    | GTTCCAGGTCATGCAGTTC               | 274bp               |
| pSema5B ChIP R    | CTAACC GGGAATGAAAGATGG            |                     |
| pEphB1 ChIP F     | GCAGTTCTCCTAAATCACCAC             | 284bp               |
| pEphB1 ChIP R     | GTCACATTGCGAGCTACAG               |                     |
| Pax6 fl/fl F      | AAATGGGGGTGAAGTGTGAG              | 280 & 350bp         |
| Pax6 fl/fl R      | GGAGCAGTCCTTCACCTCTG              |                     |
| Cre F             | CGATGCAACGAGTGATGAGGTTC           | 345bp               |
| Cre R             | GCACGTTACCCGGCATCAAC              |                     |
| Ephb1 F           | ACGGAAGTCAGGAGCTTTG               | 303bp               |
| Ephb1 R           | CTCATAGCCAGGCTTACAGG              |                     |
| Sema5b F          | TGAGATTCCTGTCATCCTACC             | 310bp               |
| Sema5b R          | GTAGAAGTTGGCTCTGTCATC             |                     |
| Pax6 F            | CCAACGGTTGTGTGAGTAAATTC           | 258bp               |
| Pax6 R            | GCTTTTCGCTAGCCAGGTTGCGAAGAAC      |                     |
| Beta actin F      | AGACTTCGAGCAGGAGATG               | 322bp               |
| Beta actin R      | CTTGATCTTCATGGTGCTAGG             |                     |

**List of antibodies used in the study:**

| <b>Antibody</b>  | <b>Dilution</b> | <b>Source</b> | <b>Identifier</b>                        |
|------------------|-----------------|---------------|------------------------------------------|
| Rabbit anti-Pax6 | 1:200           | Millipore     | (Millipore Cat# AB2237, RRID:AB_1587367) |
| Mouse anti-Pax6  | 1:200           | DSHB          | (DSHB Cat# pax6, RRID:AB_528427)         |
| Goat anti-Brn3   | 1:100           | Santa Cruz    | (Santa Cruz                              |

|                                                                                       |        |                        |                                                                    |
|---------------------------------------------------------------------------------------|--------|------------------------|--------------------------------------------------------------------|
|                                                                                       |        |                        | Biotechnology Cat# sc-6026, RRID:AB_673441)                        |
| Mouse anti-Ap2 $\alpha$                                                               | 1:50   | DSHB                   | (DSHB Cat# 5E4, RRID:AB_2056333)                                   |
| Mouse anti-Recoverin                                                                  | 1:500  | Abcam                  | (Abcam Cat# ab31928, RRID:AB_882309)                               |
| Mouse anti-Calbindin                                                                  | 1:1000 | Sigma                  | (Sigma-Aldrich Cat# C9848, RRID:AB_476894)                         |
| Mouse anti-SMI31                                                                      | 1:1000 | Covance                | (Covance Research Products Inc Cat# SMI-31R-100, RRID:AB_10122491) |
| Rabbit anti- $\beta$ III tubulin                                                      | 1:500  | Millipore              | AB5564                                                             |
| Goat anti-Rabbit IgG (H+L) Cross-Adsorbed Secondary Antibody, Alexa Fluor 488         | 1:200  | Invitrogen             | (Molecular Probes Cat# A-11008, RRID:AB_143165)                    |
| Cy <sup>TM</sup> 3 AffiniPure F(ab') <sub>2</sub> Fragment Goat Anti-Rabbit IgG (H+L) | 1:400  | Jackson Immunoresearch | (Jackson ImmunoResearch Labs Cat# 111-166-003, RRID:AB_2338007)    |
| Cy <sup>TM</sup> 3 AffiniPure F(ab') <sub>2</sub> Fragment Goat Anti-Mouse IgG (H+L)  | 1:400  | Jackson Immunoresearch | (Jackson ImmunoResearch Labs Cat# 115-166-003, RRID:AB_2338699)    |
| Cy <sup>TM</sup> 3 AffiniPure F(ab') <sub>2</sub> Fragment Donkey Anti-Goat IgG (H+L) | 1:400  | Jackson Immunoresearch | (Jackson ImmunoResearch Labs Cat# 705-165-003, RRID:AB_2340411)    |
